# Supplementary material for: Analysis of the Global Ocean Sampling (GOS) Project for Trends in Iron Uptake by Surface Ocean Microbes
Source: PLoS One. 2012 Feb 17;7(2):e30931. doi: 10.1371/journal.pone.0030931 (PMC3281889; doi:10.1371/journal.pone.0030931)
Supplement: Table S2 — Identity between gene families in the database. (XLS) [file pone.0030931.s004.xls]

## Sheet: id
Gene	Max ID% with non-orthologue	Max ID% with other pathway	number of sequences	phylogenetic spread (number of phylums)	number of hits in metagenomes
CN:RecA	-	-	120	11	4396
F2:EfeB	-	-	1	1	0
F2:EfeU	30.38	30.38	6	3	0
F2:EfeO	-	-	1	1	0
F2:FeoB	39.73	39.73	137	11	323
F2:YfeA	-	-	13	4	84
F2:YfeB	43.48	43.48	24	6	84
F2:YfeC	47.49	-	25	4	76
F2:YfeD	47.76	-	20	3	11
F3:FbpA	62.07	58.14	18	3	5
F3:FbpB	52.96	-	13	4	1
F3:FbpC	54.17	39.11	39	6	128
F3:FutA	62.07	61.01	4	3	254
F3:FutB	52.96	-	5	3	58
F3:FutC	54.17	35.71	2	1	13
F3:SfuB	-	-	2	2	0
F3:SfuC	-	-	1	1	2
F3:YfuA	31.52	31.52	2	1	0
F3:YfuB	25.62	-	1	1	0
F3:YfuC	45.45	36.41	3	2	0
FL:flav	-	-	181	11	46
HE:HasA	-	-	4	1	0
HE:HasB	-	-	1	1	0
HE:HasR	38.85	33.9	12	4	3
HE:Hbp	-	-	1	1	0
HE:HemS	45.81	-	6	4	0
HE:HmuR	40.7	40.7	10	4	1
HE:HmuT	36.47	36.47	27	7	2
HE:HmuU	46.75	46.75	26	7	1
HE:HmuV	43.31	43.31	40	8	1
HE:HmuY	-	-	2	2	0
HE:HmuY'	-	-	1	1	0
HE:HugZ	-	-	9	3	0
HE:HutD	-	-	2	1	0
HE:IsdG	64.49	-	3	1	0
HE:IsdI	64.49	-	1	1	0
HE:PhuR	38.52	38.52	10	5	5
HE:PhuS	45.88	-	1	1	2
HE:PhuT	32.11	32.11	4	1	0
HE:PhuU	42.12	42.12	2	2	1
HE:PhuV	41.47	41.47	3	1	4
HE:PhuW	-	-	6	2	0
HE:RhbB	-	-	1	1	0
HE:RhbD	39.67	39.67	2	2	0
HE:RhbF	44.35	44.35	3	2	0
OX:DpsA	62.36	62.36	9	6	14
OX:IsiA	48.9	48.9	19	1	148
OX:SodA	99.52	-	22	7	274
OX:SodB	99.52	-	118	11	353
RG:ExbB	-	-	59	10	306
RG:ExbD	-	-	75	11	26
RG:FeoA	40.54	40.54	75	11	17
RG:FeoC	-	-	6	1	0
RG:FpvI	-	-	2	1	3
RG:FpvR	-	-	2	1	0
RG:Fur	-	-	35	10	255
RG:PchR	-	-	4	4	0
RG:PvdS	-	-	2	2	9
SS:AcsA	31.87	25.31	3	1	0
SS:AcsC	39.12	39.12	3	1	0
SS:AcsD	35.35	25	4	1	0
SS:AmoA	41.06	-	1	1	0
SS:angR	43.53	-	3	1	0
SS:AsbA	38.94	25.08	1	1	0
SS:AsbB	44.14	44.14	1	1	0
SS:AsbC	23.41	-	1	1	0
SS:AsbD	-	-	1	1	0
SS:AsbE	-	-	1	1	0
SS:AsbF	-	-	1	1	0
SS:IucA	38.94	25.3	9	4	0
SS:IucB	39.67	39.67	11	4	0
SS:IucC	39.67	39.67	10	3	0
SS:IucD	76.5	-	12	4	0
SS:PchA	39.84	-	3	3	0
SS:PchB	-	-	4	3	0
SS:PchC	-	-	3	2	0
SS:PchD	50.97	-	4	3	2
SS:PchE	50.43	-	2	2	0
SS:PchF	47.06	-	2	2	0
SS:PchG	-	-	2	2	0
SS:PchH	46	39.11	3	3	0
SS:PchI	44	36.07	2	2	0
SS:PvdA	75.43	-	6	4	0
SS:PvdD	53.97	-	2	2	0
SS:PvdE	36.5	36.5	4	2	0
SS:PvdF	-	-	2	2	0
SS:PvdH	-	-	1	1	0
SS:PvdI	56.12	-	2	2	0
SS:PvdJ	54.79	-	1	1	0
SS:PvdL	72	-	1	1	0
SS:PvdM	-	-	2	2	2
SS:PvdN	-	-	1	1	0
SS:PvdO	-	-	3	1	0
SS:PvdP	-	-	1	1	0
SS:PvdQ	-	-	1	1	0
SS:PvsA	72.09	-	6	2	0
SS:PvsB	33.23	24.12	4	2	0
SS:PvsC	-	-	1	1	0
SS:PvsD	36.55	27.98	2	2	0
SS:PvsE	-	-	4	2	0
SS:VabA	-	-	1	1	0
SS:VabB	57.93	-	1	1	0
SS:VabC	39.49	-	1	1	0
SS:VabD	-	-	1	1	0
SS:VabE	61.87	-	1	1	0
SS:VabF	43.2	-	1	1	0
SS:VabG	-	-	1	1	0
SS:VabH	-	-	1	1	0
SS:VabS	-	-	1	1	0
SS:VibB	57.93	-	1	1	0
SS:VibE	61.87	-	2	2	0
SS:VibF	31.8	-	2	1	0
SS:VibH	25.61	-	3	2	0
ST:bfr	33.08	33.08	37	7	111
ST:Ftn	-	-	5	3	2
ST:FtnA	62.29	62.29	81	11	28
SU:dicU	-	-	1	1	0
SU:FatB	42.25	-	3	2	0
SU:FatC	29.49	27.24	17	5	0
SU:FatD	37.29	33.81	13	5	0
SU:FecA	49.02	41.61	95	10	307
SU:FecB	43.01	36.36	25	8	0
SU:FepA	47.55	41.18	35	6	5
SU:FepB	53.02	40.58	13	4	0
SU:FepC	-	-	2	2	1
SU:FhuA	49.02	41.57	26	7	0
SU:FhuB	67.31	46.75	30	5	2
SU:FhuC	57.87	45.45	37	6	2
SU:FhuD	57.41	34.49	28	6	0
SU:FptA	38.27	-	2	2	0
SU:FpuA	42.06	-	1	1	0
SU:FpvA	36.98	33.9	5	2	2
SU:FvtA	27.46	-	1	1	0
SU:HatB	57.41	37.45	3	2	0
SU:HatC	67.31	42.13	3	2	0
SU:HatD	46.35	-	1	1	0
SU:IroN	35.81	35.4	7	3	0
SU:IutA	39.51	35.86	10	2	0
SU:PvuA	34.68	31.5	3	2	0
SU:VctP	38.18	-	2	1	0
