# Supplementary material for: Analysis of the Global Ocean Sampling (GOS) Project for Trends in Iron Uptake by Surface Ocean Microbes
Source: PLoS One. 2012 Feb 17;7(2):e30931. doi: 10.1371/journal.pone.0030931 (PMC3281889; doi:10.1371/journal.pone.0030931)
Supplement: Table S3 — Metagenomes and associated environmental variables. (XLS) [file pone.0030931.s005.xls]

## Sheet: Metagenomes
Sample name	Habitat Type	Geographic Location	Latitude	Longitude	Fe (nM)	NO3 (µM)	Si (µM)	Total PP (molC/m2/yr)	Sample depth (m)	Water depth (m)	Salinity (psu)	Temperature (°C)	File size (MB)	Chlorophyll (µg/kg)
AA1	Marine-derived lake	Ace lake. Antarctica	68°24'0"S	78°10'58"E	NA	NA	NA	NA	23	NA	NA	NA	128.5	NA
AA4	Marine-derived lake	Ace lake. Antarctica	68°24'0"S	78°10'58"E	NA	NA	NA	NA	12.7	NA	NA	NA	69.7	NA
AA5	Marine-derived lake	Ace lake. Antarctica	68°24'0"S	78°10'58"E	NA	NA	NA	NA	11.5	NA	NA	NA	361.2	NA
AA6	Marine-derived lake	Ace lake. Antarctica	68°24'0"S	78°10'58"E	NA	NA	NA	NA	5	NA	NA	NA	357.6	NA
AA8	Coastal	Newcomb Bay. Antarctica	66°16'12"S	110°31'59"E	0.337	27.52	75	0.2951	1.83	NA	15.97	-0.37	129.9	NA
AA9	Open Ocean	Open water. Antarctica	63°53'28"S	112°4'23"E	0.227	27.19	72.2	0.2179	2	NA	33.09	-0.66	125.5	NA
BB1	Coastal	Botany Bay. Australia	33°59'27"S	151°13'55"E	NA	NA	NA	NA	2	NA	NA	NA	125.7	NA
GS001	Open Ocean	Sargasso Sea	32°10'00"N	64°30'00"W	0.932	0.59	2.5	0.1723	5	>4200	36.7	22.9	156.8	0.10
GS002	Coastal	North American East Coast	42°30'11"N	67°14'24"W	1.308	3.3	5.3	0.5599	1	106	29.2	18.2	150.2	1.4
GS003	Coastal	North American East Coast	42°51'10"N	66°13'2"W	1.255	3.57	5.5	0.5452	1	119	29.9	11.7	108.4	1.4
GS004	Coastal	North American East Coast	44°8'14"N	63°38'40"W	NA	NA	NA	NA	2	142	28.3	17.3	92.8	0.4
GS007	Coastal	North American East Coast	43°37'56"N	66°50'50"W	1.35	3.55	5.8	0.6036	1	139	31.7	17.9	89.7	1.4
GS008	Coastal	North American East Coast	41°29'9"N	71°21'4"W	NA	NA	NA	NA	1	12	26.5	9.4	160.6	2.2
GS009	Coastal	North American East Coast	41°5'28"N	71°36'8"W	NA	NA	NA	NA	1	32	31	11	98.6	4.0
GS010	Coastal	North American East Coast	38°56'24"N	74°41'6"W	NA	NA	NA	NA	1	10	31	12	96.2	2.0
GS013	Coastal	North American East Coast	36°0'14"N	75°23'41"W	1.597	0.63	3.2	0.3505	2.1	20	NA	9.3	173.8	3.0
GS014	Coastal	North American East Coast	32°30'25"N	79°15'50"W	1.736	0.37	3.1	0.1893	1	31	NA	18.6	163	1.70
GS015	Coastal	Caribbean Sea	24°29'18"N	83°4'12"W	1.705	0.27	3	0.0252	1.7	47	36	25	160.9	0.2
GS016	Coastal	Caribbean Sea	24°10'29"N	84°20'40"W	1.69	0.27	3	0.0283	2	3333	35.8	26.4	160.3	0.16
GS017	Open Ocean	Caribbean Sea	20°31'21"N	85°24'49"W	1.622	0.23	2.9	0.028	2	4513	35.8	27	455.7	0.13
GS018	Open Ocean	Caribbean Sea	18°2'12"N	83°47'5"W	1.495	0.2	2.8	0.008	1.7	4470	35.4	27.4	253.6	0.14
GS019	Coastal	Caribbean Sea	10°42'59"N	80°15'16"W	1.833	0.29	2.9	0.0375	1.7	3336	35.4	27.7	238.1	0.23
GS021	Coastal	Eastern Tropical Pacific	8°7'45"N	79°41'28"W	NA	NA	NA	NA	1.6	76	30.7	27.6	232.7	0.50
GS022	Open Ocean	Eastern Tropical Pacific	6°29'34"N	82°54'14"W	0.23	0.9	2.7	0.637	2	2431	32.3	29.3	213.5	0.33
GS023	Open Ocean	Eastern Tropical Pacific	5°38'24"N	86°33'55"W	0.043	1.37	3.6	0.3426	2	1139	32.6	28.7	234.8	0.07
GS026	Open Ocean	Galapagos Islands	1°15'51"N	90°17'42"W	0.017	3.44	4.8	0.3857	2	2386	32.6	27.8	178.9	0.22
GS027	Coastal	Galapagos Islands	1°12'58"S	90°25'22"W	0.022	5.54	5.7	0.4735	2.2	2.3	34.9	25.5	388.3	0.40
GS028	Coastal	Galapagos Islands	1°13'1"S	90°19'11"W	0.022	5.54	5.7	0.4729	2	156	34.38	24	333.4	0.35
GS029	Coastal	Galapagos Islands	0°12'0"S	90°50'7"W	0.021	4.78	5.4	0.4623	2.1	12	34.5	26.2	233.1	0.40
GS031	Coastal	Galapagos Islands	0°18'4"S	91°39'6"W	0.021	5.06	5.7	0.4389	12	19.6	34.26	18.6	758.5	0.35
GS034	Coastal	Galapagos Islands	0°22'59"S	90°16'47"W	0.021	4.8	5.4	0.4633	2.1	35	34.19	27.5	233.6	0.36
GS035	Coastal	Galapagos Islands	1°23'21"N	91°49'1"W	0.016	3.48	5	0.3763	1.7	71	34.5	21.8	247	0.28
GS036	Coastal	Galapagos Islands	0°1'15"S	91°11'52"W	0.021	4.82	5.5	0.4638	2.1	67	34.6	25.8	138	0.65
GS037	Open Ocean	Eastern Tropical Pacific	1°58'26"S	95°0'53"W	0.022	6.12	6.5	0.4557	1.8	3334	34.6	28	80.2	0.21
GS047	Open Ocean	Tropical South Pacific	10°7'53"S	135°26'58"W	0.004	0.47	5.4	0.0842	30	2400	37.3	28.6	80.3	NA
GS048	Coral Reef	Polynesia Archipelagos	17°28'33"S	149°48'44"W	0.086	0	4.8	0.0226	1.4	34	35.1	28.9	182.7	0.095
GS049	Coastal	Polynesia Archipelagos	17°27'11"S	149°47'56"W	0.086	0	4.8	0.0226	1.4	900	32.6	28.8	186.7	0.095
GS051	Coral Reef	Polynesia Archipelagos	15°8'37"S	147°26'6"W	0.083	0	5	0.0225	1	10	34.2	27.3	163.6	NA
GS108	Coral Reef	Indian Ocean	12°5'33"S	96°52'54"E	0.36	0.02	2.3	0.1732	1.8	7	32.4	25.8	75.3	0.108
GS109	Open Ocean	Indian Ocean	10°56'37"S	92°3'32"E	0.237	0.01	2.2	0.0789	1.5	4573	32.6	27.2	89.8	0.138
GS110	Open Ocean	Indian Ocean	10°26'46"S	88°18'10"E	0.205	0.02	2.3	0.0773	1.5	1220	32.7	27.0	145.5	0.128
GS111	Open Ocean	Indian Ocean	9°35'49"S	84°11'51"E	0.196	0.03	2.3	0.0889	1.8	3841	32.3	26.4	88.9	0.203
GS112	Open Ocean	Indian Ocean	8°30'18"S	80°22'32"E	0.189	0.03	2.3	0.0826	1.8	4573	32.5	26.6	147.3	0.134
GS113	Open Ocean	Indian Ocean	7°0'27"S	76°19'53"E	0.208	0.02	2.2	0.0409	1.8	4573	33.3	27.5	167.9	0.24
GS114	Open Ocean	Indian Ocean	4°59'25"S	64°58'36"E	0.239	0.03	2.1	0.0097	1.5	3649	33.1	28.2	517	0.14
GS115	Open Ocean	Indian Ocean	4°39'45"S	60°31'23"E	0.238	0.03	2.2	0.0096	1.5	3220	33.2	27.9	91.9	0.142
GS116	Open Ocean	Indian Ocean	4°38'6"S	56°50'10"E	0.245	0.02	2.2	0.0127	1.5	2150	33.1	26.2	93	0.287
GS117	Coastal	Indian Ocean	4°36'49"S	55°30'31"E	0.239	0.02	2.2	0.0162	1.8	14	35.5	26.4	503.1	0.206
GS119	Open Ocean	Indian Ocean	23°12'58"S	52°18'22"E	0.342	0.02	2.3	0.0105	2	2995	35.4	23.8	94.6	0.078
GS120	Open Ocean	Indian Ocean	26°2'6"S	50°7'23"E	0.398	0.02	2.3	0.0156	2.8	5081	35.6	22.5	66.9	0.117
GS121	Open Ocean	Indian Ocean	29°20'56"S	43°12'56"E	0.661	0.03	2.4	0.0587	1.5	4309	35.4	23.1	173.9	0.14
GS122	Open Ocean	Indian Ocean	30°53'54"S	40°25'13"E	0.4	0.08	2.3	0.09	1.9	4921	35.8	20.2	155.8	0.151
GS123	Open Ocean	Indian Ocean	32°23'57"S	36°35'31"E	0.312	0.17	2.3	0.2052	2.2	1860	35.8	20.4	169	0.228
GS148	Coral Reef	Indian Ocean	6°19'S	39°33"E	NA	NA	NA	NA	0.3	1	NA	NA	148.4	NA
